# Supplementary material for: Genomic Profiling of Antibiotic-Resistant Escherichia coli Isolates from Surface Water of Agricultural Drainage in North-Western Mexico: Detection of the International High-Risk Lineages ST410 and ST617
Source: Microorganisms. 2022 Mar 20;10(3):662. doi: 10.3390/microorganisms10030662 (PMC8948617; doi:10.3390/microorganisms10030662)
Supplement: Supplementary file 1 [file microorganisms-10-00662-s001.zip › microorganisms-1610943 Supplementary Tables.xlsx]

## Sheet: ST410_cgMLSTsubtree
Table S1. Metadata associated with Escherichia coli ST410 genomes from EnteroBase used for cgMLST subtree phylogeny.
Barcode	Isolate name	ST (cgMLST)	Region	District	Collection Month	Collection Year	Lab Contact	Continent	Country	Date Entered	Latitude	Longitude	Release Date	Sample ID	Secondary Sample ID	Project ID	Source Details	Source Niche	Source Type	Species	Bio Project ID	Uberstrain
ESC_BA6565AA	eo145	ST10931					THE SANGER CENTER			2015-08-27			2014-05-14	SAMEA2204684	ERS357195	ERP003992				Escherichia coli	PRJEB4681	16565
ESC_BA7401AA	eo144	ST10104					THE SANGER CENTER			2015-08-27			2014-05-14	SAMEA2204683	ERS357194	ERP003992				Escherichia coli	PRJEB4681	17401
ESC_CA5791AA	EuSCAPE_ES022	ST18544					SC			2016-02-01			2016-01-27	SAMEA3538894	ERS846043	ERP011196				Escherichia coli	PRJEB10018	25791
ESC_DA3385AA	50822286	ST22334				2014	Norwegian National Advisory Unit on Detection of Antimicrobial Resistance	Europe	Norway	2016-06-24			2016-12-27				Feces	Human	Human	Escherichia coli		33385
ESC_EA6947AA	75a9d020-fa7c-11e5-ae86-3c4a9275d6c8	ST32451					SC			2016-10-02			2016-09-30	SAMEA3981981	ERS1153091	ERP014412				Escherichia coli	PRJEB12887	46947
ESC_EA6982AA	82df0210-fa7c-11e5-9ab9-3c4a9275d6c8	ST32591					SC			2016-10-02			2016-09-30	SAMEA3982276	ERS1153386	ERP014412				Escherichia coli	PRJEB12887	46982
ESC_EA7476AA	245977c0-fa7c-11e5-a5c7-3c4a9275d6c8	ST31978					SC			2016-10-02			2016-09-30	SAMEA3981058	ERS1152168	ERP014412				Escherichia coli	PRJEB12887	47476
ESC_EA7552AA	27cccc90-fa7c-11e5-8812-3c4a9275d6c8	ST31704					SC			2016-10-02			2016-09-30	SAMEA3981188	ERS1152298	ERP014412				Escherichia coli	PRJEB12887	47552
ESC_EA7739AA	25c58ae0-fa7c-11e5-b5da-3c4a9275d6c8	ST32033					SC			2016-10-02			2016-09-30	SAMEA3981113	ERS1152223	ERP014412				Escherichia coli	PRJEB12887	47739
ESC_EA8853AA	14065450	ST33157				2014	P. Alba (IZSLT)	Europe	Italy	2016-10-21			2017-04-25							Escherichia coli		48853
ESC_FA7236AA	96729ad0-fa7c-11e5-a5c7-3c4a9275d6c8	ST39233					SC			2017-01-15			2017-01-12	SAMEA4061466	ERS1232576	ERP014412				Escherichia coli	PRJEB12887	57236
ESC_FA7387AA	95c4f5b0-fa7c-11e5-b612-3c4a9275d6c8	ST39097					SC			2017-01-15			2017-01-12	SAMEA4061459	ERS1232569	ERP014412				Escherichia coli	PRJEB12887	57387
ESC_FA8636AA	5c2f3210-7fd4-11e6-b8fe-3c4a9275d6c8	ST40675					SC			2017-02-14			2017-02-09	SAMEA4470018	ERS1369197	ERP017161				Escherichia coli	PRJEB15430	58636
ESC_FA8667AA	5a879c90-7fd4-11e6-b8fe-3c4a9275d6c8	ST40793					SC			2017-02-14			2017-02-09	SAMEA4469987	ERS1369166	ERP017161				Escherichia coli	PRJEB15430	58667
ESC_FA8971AA	7ce67090-7fd4-11e6-b8fe-3c4a9275d6c8	ST42890					SC			2017-02-22			2017-02-22	SAMEA4470329	ERS1369508	ERP017161				Escherichia coli	PRJEB15430	58971
ESC_GA9545AA	MER-79	ST50252				2015	University of Queensland	Asia	Singapore	2017-08-16			2017-08-15	SAMN07510247	SRS2433229	SRP115500	blood; Homo sapiens; Age: 38; female; Blood	Human	Human	Escherichia coli	PRJNA398288	69545
ESC_GA9568AA	MER-86	ST57908				2015	University of Queensland	Asia	Singapore	2017-08-16			2017-08-15	SAMN07510251	SRS2433207	SRP115500	blood; Homo sapiens; Age: 38; male; Blood	Human	Human	Escherichia coli	PRJNA398288	69568
ESC_GA9862AA	20160160	ST50643					academisch medisch centrum	Asia	Vietnam	2017-08-22			2017-08-22	SAMEA104188768	ERS1847786	ERP024314	Human; Feces	Human	Human	Escherichia coli	PRJEB21997	69862
ESC_KA4531AA		ST75902				2012	Institut Pasteur	Europe	France	2018-10-25			2018-10-25	SAMEA4727894	ERS2548027	ERP109337	Homo sapiens; Urine	Human	Human	Escherichia coli	PRJEB27274	104531
ESC_LA8671AA	strain 168	ST84802			6	2014	Tan Tock Seng Hospital	Asia	Singapore	2019-02-11	1.17	103.5	2017-01-01	SAMN05770950	SRS1718162	SRP090607	Homo sapiens	Human	Human	Escherichia coli	PRJNA342893	118671
ESC_MA4782AA	N94	ST94008					cagef			2019-04-29			2019-04-29							Escherichia coli		124782
ESC_MA6260AA	SCAE007	ST95594				2016	Department of Microbiology, Zhongshan School of Medicine, Sun Yat-sen University			2019-05-25			2020-05-31							Escherichia coli		126260
ESC_MA6317AA	SCBH170	ST95631				2017	Department of Microbiology, Zhongshan School of Medicine, Sun Yat-sen University			2019-05-26			2020-06-01							Escherichia coli		126317
ESC_MA6420AA	SCAA232	ST95721				2016	Department of Microbiology, Zhongshan School of Medicine, Sun Yat-sen University			2019-05-26			2020-06-01							Escherichia coli		126420
ESC_MA6565AA	SCBA2123	ST95854				2017	Department of Microbiology, Zhongshan School of Medicine, Sun Yat-sen University			2019-05-27			2020-06-02							Escherichia coli		126565
ESC_MA6583AA	SCBA226	ST95871				2017	Department of Microbiology, Zhongshan School of Medicine, Sun Yat-sen University			2019-05-27			2020-06-02							Escherichia coli		126583
ESC_OA5282AA	ECOL-19-VL-SD-MN-0001	ST116746	Minnesota		3	2019	FDA Center for Food Safety and Applied Nutrition	North America	United States	2019-10-18			2019-10-10	SAMN13012323	SRS5501088	SRP125339	Canne Urine (Canis familiaris )	Companion Animal	Canine	Escherichia coli	PRJNA318591	145282
ESC_OA5418AA	113979	ST116634	New Brunswick		3	2015	National Microbiology Laboratory	North America	Canada	2019-10-18			2019-10-09	SAMN12731673	SRS5494799	SRP221408	Homo sapiens; Age: 60; male; blood	Human	Human	Escherichia coli	PRJNA564992	145418
ESC_RA8479AA	128CM2	ST141911				2018	IMBIM(Department of Medical Biochemistry and Microbiology)	Asia	Thailand	2020-07-16	16.4322	102.8346	2020-07-14	SAMEA6832396	ERS4560014	ERP121726	Homo sapiens; ESBL Isolation Media	Human	Human	Escherichia coli	PRJEB38313	178479
ESC_TA7126AA	pig5_18	ST154091	Hong Kong			2018	The Chinese University of Hong Kong	Asia	China	2021-01-03	22.3797	114.2017	2021-01-02	SAMN17203971	SRS7956671	SRP278777	pig	Livestock	Swine	Escherichia coli	PRJNA595034	197126
ESC_TA7127AA	pig4_18	ST154092	Hong Kong			2018	The Chinese University of Hong Kong	Asia	China	2021-01-03	22.3797	114.2017	2021-01-02	SAMN17203970	SRS7956670	SRP278777	pig	Livestock	Swine	Escherichia coli	PRJNA595034	197127
ESC_TA7129AA	pig2_18	ST154136	Hong Kong			2018	The Chinese University of Hong Kong	Asia	China	2021-01-03	22.3797	114.2017	2021-01-02	SAMN17203968	SRS7956668	SRP278777	pig	Livestock	Swine	Escherichia coli	PRJNA595034	197129
ESC_TA9494AA	PAT-17-34500/ECX	ST157117				2017	Centre for Genomic Epidemiology, National Food Institute, Technical University of Denmark (DTU), Denmark	Europe	Portugal	2021-01-22	39.399872	-8.224454	2021-01-20	SAMEA5732355	ERS3535658	ERP115939	Sus scrofa domesticus; caecal sample	Livestock	Swine	Escherichia coli	PRJEB33169	199494
ESC_UA5406AA	E3220433_2013	ST161681				2013	THE UNIVERSITY OF MELBOURNE	Oceania	Australia	2021-03-20			2021-03-17	SAMEA8101214	ERS5788294	ERP126848	Homo sapiens	Human	Human	Escherichia coli	PRJEB42922	205406
ESC_UA6564AA	ADD147	ST162049	Sinaloa	Navolato		2013	Universidad Autonoma de Sinaloa		Mexico	2021-03-23	24.72489	-107.62072	2021-03-20	SAMN18352997	SRS8517855	SRP311424	Water (agricultural drainage ditch)	Environment	Water/River	Escherichia coli	PRJNA715781	206564
ESC_UA8639AA	PEROU H09RT	ST158722				2017	monkeylab			2021-04-02			2022-02-06									208639
ESC_UA8974AA	C550	ST162924	Udon Thani Province		2	2017	OSAKA_RIMD		Thailand	2021-04-06			2021-04-05	SAMD00138058	DRS178640	DRP004189	Homo sapiens	Human	Human	Escherichia coli	PRJDB5929	208974
ESC_VA5932AA	VAR-638	ST169120				2013	Sciensano	Europe	Belgium	2021-06-01			2021-05-07	SAMN16495389	SRS7549479	SRP287977				Escherichia coli	PRJNA670414	215932
ESC_VA5937AA	VAR-633	ST169123				2013	Sciensano	Europe	Belgium	2021-06-01			2021-05-07	SAMN16495384	SRS7549475	SRP287977				Escherichia coli	PRJNA670414	215937
ESC_WA3852AA	VO32_S24	ST175330					QIA			2021-08-25			2021-08-25									223852
ESC_WA5816AA	SYSUSCAA232	ST95721				2016	Sun Yat-sen University	Asia	China	2021-09-07			2021-09-06	SAMN21238369	SRS10030046	SRP262450	pig	Livestock	Swine	Escherichia coli	PRJNA593695	225816
ESC_WA5861AA	SYSUSCBH170	ST95631				2017	Sun Yat-sen University	Asia	China	2021-09-07			2021-09-06	SAMN21238909	SRS10030001	SRP262450	food	Food	ND/Others	Escherichia coli	PRJNA593695	225861
ESC_WA6077AA	SYSUSCAE007	ST95594				2016	Sun Yat-sen University	Asia	China	2021-09-07			2021-09-06	SAMN21238552	SRS10029785	SRP262450	Patient infected with Enterobacteriaceae	Human	Human	Escherichia coli	PRJNA593695	226077
ESC_WA6148AA	SYSUSCBA226	ST95871				2017	Sun Yat-sen University	Asia	China	2021-09-07			2021-09-06	SAMN21238715	SRS10029714	SRP262450	pig	Livestock	Swine	Escherichia coli	PRJNA593695	226148
ESC_WA6163AA	SYSUSCBA2123	ST95854				2017	Sun Yat-sen University	Asia	China	2021-09-07			2021-09-06	SAMN21238701	SRS10029699	SRP262450	pig	Livestock	Swine	Escherichia coli	PRJNA593695	226163
ESC_YA2494AA	YD786	ST187850			7	2019	Texas Tech University		Dominican Republic	2022-01-14			2022-01-12	SAMN22045416	SRS11629952	SRP354690	Environmental-Swinefarm-Feed	Environment	ND/Others	Escherichia coli	PRJNA761490	242494
ESC_YA2503AA	YD786	ST187866			7	2019	Texas Tech University		Dominican Republic	2022-01-14			2022-01-12	SAMN22045356	SRS11629942	SRP354690	Environmental-Swinefarm-Feed	Environment	ND/Others	Escherichia coli	PRJNA761490	242503
ESC_YA5004AA	PSU-4926	ST190113				2019	DudleyLab|PennStateUniversity		Pakistan	2022-02-02			2022-02-01	SAMN25558098	SRS11847064	SRP101500	Chicken; Chicken liver	Poultry	Poultry	Escherichia coli	PRJNA357722	245004

## Sheet: ST617_cgMLSTsubtree
Table S2. Metadata associated with Escherichia coli ST617 genomes from EnteroBase used for cgMLST subtree phylogeny.
Barcode	Isolate name	ST (cgMLST)	Region	District	City	Collection Day	Collection Month	Collection Year	Comment	Lab Contact	Continent	Country	Date Entered	Latitude	Longitude	Post Code	Release Date	Sample ID	Secondary Sample ID	Project ID	Source Details	Source Niche	Source Type	Species	Bio Project ID	Uberstrain
ESC_BA5832AA	eo1482	ST11513								THE SANGER CENTER			2015-08-27				2014-05-14	SAMEA2272890	ERS380285	ERP004424				Escherichia coli	PRJEB5065	15832
ESC_BA7216AA	eo3387	ST10284								THE SANGER CENTER			2015-08-27				2014-05-14	SAMEA2205569	ERS358080	ERP003992				Escherichia coli	PRJEB4681	17216
ESC_DA3742AA	0000-0057-7635	ST27040						2015		Brigham & Women's Hospital			2016-06-30				2016-04-12	SAMN04622919	SRS1381424	SRP056445	blood; Homo sapiens; Age: 67; female	Human	Human	Escherichia coli	PRJNA278886	33742
ESC_EA3834AA	02461	ST29131						2014		University Hospital Muenster	Europe	Germany	2016-08-19				2016-08-16	SAMEA3716529	ERS1023678	ERP009121				Escherichia coli	PRJEB8084	43834
ESC_EA6210AA	5639	ST32974				6	10	2015	Yemen	Karolinska Institutet	Asia	Oman	2016-10-08				2017-10-15				BIOPSY	Human	Human	Escherichia coli		46210
ESC_GA6425AA	z821_11	ST47203						2006		Department of Medical Microbiology, UMC Utrecht			2017-06-08				2018-06-15							Escherichia coli		66425
ESC_IA4657AA	C15-08	ST61366	Normandy	Calvados	Caen			2015		Dr S. Le Hello	Europe	France	2018-02-28				2018-09-02				Stools	Human	Human	Escherichia coli		84657
ESC_KA2455AA	17086-A	ST82804								Clinical Microbiology, Uppsala University			2018-12-12				2019-12-19									102455
ESC_KA2457AA	17086-B	ST82848								Clinical Microbiology, Uppsala University			2018-12-12				2019-12-19									102457
ESC_LA4981AA	CRE01	ST87920					1	2013		Stanford Healthcare	Unresolved		2019-02-11	37.4335	-122.1754		2018-03-29	SAMN08623777	SRS3008978	SRP133707	Homo sapiens; bloodstream; blood	Human	Human	Escherichia coli	PRJNA436373	114981
ESC_MA0545AA	CC8	ST86180	Oyo	Ibadan North West	Ibadan	1	10	2014		Jochen Mueller	Africa	Nigeria	2019-03-04			200200	2019-03-04				Sediment	Environment	Water/River	Escherichia coli		120545
ESC_MA6965AA		ST98032						2015		Karolinska Institutet	Asia	Oman	2019-05-30				2019-05-23	SAMN11840214	SRS4809941	SRP199302	Homo sapiens	Human	Human	Escherichia coli	PRJNA544438	126965
ESC_OA1899AA	81687	ST114021	Nova Scotia				5	2008		National Microbiology Laboratory	North America	Canada	2019-09-17				2019-09-16	SAMN12731345	SRS5391867	SRP221408	Homo sapiens; Age: 78; male; blood	Human	Human	Escherichia coli	PRJNA564992	141899
ESC_OA2160AA	88753	ST114436	Quebec				7	2009		National Microbiology Laboratory	North America	Canada	2019-09-20				2019-09-20	SAMN12731398	SRS5414281	SRP221408	Homo sapiens; Age: 61; male; blood	Human	Human	Escherichia coli	PRJNA564992	142160
ESC_OA8459AA	ST617 carrying blaSHV-12	ST120707	Orebro County	Orebro kommun			10	2013		Orebro University Hospital	Europe	Sweden	2019-11-18	59.28	15.29		2019-11-05	SAMN12429409	SRS5196927	SRP217085	Water from Hjalmaren Lake	Environment	Water/River	Escherichia coli	PRJNA558173	148459
ESC_PA4989AA	Z821	ST123423	Netherlands				4	2006		UNIVERSITY MEDICAL CENTER UTRECHT	Europe	Netherlands	2019-12-04				2019-12-03	SAMEA4699323	ERS2519494	ERP109066	Homo sapiens; Hospital; patient	Human	Human	Escherichia coli	PRJEB27030	154989
ESC_PA6217AA	ARS-CC9542	ST125343								USDA, ARS, EMFSL	North America	United States	2020-01-06				2020-01-06					Livestock	Bovine			156217
ESC_RA1371AA	EbB054	ST136022					8	2016		Mahidol Oxford Tropical Medicine Research Unit		Cambodia	2020-04-28				2020-04-18	SAMEA6658686	ERS4418151	ERP120876	Homo sapiens; clinical	Human	Human	Escherichia coli	PRJEB37551	171371
ESC_RA4943AA	Ec-MW04	ST138943	Lilongwe		Lilongwe		9	2017		OSAKA_RIMD		Malawi	2020-05-22	-13.9626	33.7741		2020-05-22	SAMD00217188	DRS139469	DRP006139	human blood; Homo sapiens	Human	Human	Escherichia coli	PRJDB9614	174943
ESC_SA4828AA	GC85	ST145445						2010		Justus-Liebig-University Giessen	Europe	Germany	2020-10-01				2020-08-13	SAMN14491216	SRS6404043	SRP254676	Bos taurus	Livestock	Bovine	Escherichia coli	PRJNA616452	184828
ESC_UA5794AA	M951W	ST161102	Yangon				12	2018		OSAKA_RIMD		Myanmar [Burma]	2021-03-20				2021-03-15	SAMD00282663	DRS173629	DRP003581	Homo sapiens	Human	Human	Escherichia coli	PRJDB5126	205794
ESC_UA6563AA	ADD167	ST162047	Sinaloa	Navolato				2013		Universidad Autonoma de Sinaloa		Mexico	2021-03-23	24.72489	-107.62072		2021-03-20	SAMN18352998	SRS8517856	SRP311424	Water (agricultural drainage ditch)	Environment	Water/River	Escherichia coli	PRJNA715781	206563
ESC_UA9584AA	PBIO248	ST163539	Western Province	Rusizi	Butare			2014		University of Greifswald, Institute of Pharmacy		Rwanda	2021-04-13				2021-04-12	SAMEA8550388	ERS6235086	ERP126706	anthropogenic terrestrial biome; hospital; organic material; rectal swab	Human	Human	Escherichia coli	PRJEB42795	209584
ESC_VA5482AA	AUSMDU00015604	ST168711						2018		Microbiological Diagnostic Unit Public Health Laboratory	Oceania	Australia	2021-05-28				2021-05-28	SAMN18720388	SRS9084702	SRP221809	Homo sapiens; feces	Human	Human	Escherichia coli	PRJNA565795	215482
ESC_WA7092AA	ARS-CC9542	ST177026						2015		USDA	North America	United States	2021-09-23				2021-09-22	SAMN21542808	SRS10271842	SRP303820	feces	Wild Animal	ND/Others	Escherichia coli	PRJNA664052	227092

## Sheet: ST4_cgMLSTsubtree
Table S3. Metadata associated with Escherichia coli ST4 genomes from EnteroBase used for cgMLST subtree phylogeny.
Barcode	Isolate name	ST (cgMLST)	Region	District	Collection Month	Collection Year	Lab Contact	Continent	Country	Date Entered	Latitude	Longitude	Release Date	Sample ID	Secondary Sample ID	Project ID	Serotype	Source Details	Source Niche	Source Type	Species	Bio Project ID	Uberstrain
ESC_FA8027AA	Escherichia_coli-S_142	ST40370				2014	STATENS SERUM INSTITUT	Europe	Denmark	2017-02-01	55.6425	12.4754	2017-02-01	SAMEA4351110	ERS1262559	ERP015638		human; faeces	Human	Human	Escherichia coli	PRJEB14038	58027
ESC_HA3103AA	2011EL-1497-2	ST52314					Centers for Disease Control and Prevention Enteric Diseases Laboratory Branch	North America	United States	2017-09-26			2017-09-26	SAMN07702533	SRS2542066	SRP046387					Escherichia coli	PRJNA218110	73103
ESC_HA3105AA	2011EL-1640-5	ST52313					Centers for Disease Control and Prevention Enteric Diseases Laboratory Branch	North America	United States	2017-09-26			2017-09-26	SAMN07702528	SRS2542063	SRP046387					Escherichia coli	PRJNA218110	73105
ESC_HA3106AA	2011EL-1251-4	ST52315					Centers for Disease Control and Prevention Enteric Diseases Laboratory Branch	North America	United States	2017-09-26			2017-09-26	SAMN07702534	SRS2542064	SRP046387					Escherichia coli	PRJNA218110	73106
ESC_HA3125AA	2014EL-1346-6	ST52327			8	2014	Centers for Disease Control and Prevention Enteric Diseases Laboratory Branch	North America	United States	2017-09-26			2017-09-26	SAMN07702226	SRS2541473	SRP046387					Escherichia coli	PRJNA218110	73125
ESC_JA1838AA	310244	ST66829			10	2016	Public Health England	Europe	United Kingdom	2018-06-08			2018-06-08	SAMN09380552	SRS3393189	SRP042645	Escherichia Coli	human; Homo sapiens	Human	Human	Escherichia coli	PRJNA248792	91838
ESC_KA7268AA	2014EL-1346-6	ST80238	North Carolina			2014	CDC	North America	United States	2018-12-04			2017-11-02	SAMN07638908			O6:H16				Escherichia coli	PRJNA224116	107268
ESC_RA3472AA	Escherichia coli	ST136391			10	2017	LUMC	Europe	Netherlands	2020-05-03	52.1601144	4.4970097	2020-04-29	SAMEA6788290	ERS4515967	ERP121201		Faeces donor; human; Faeces	Human	Human	Escherichia coli	PRJEB37861	173472
ESC_RA4041AA	ECO20180444	ST137412				2018	Korea Centers for Disease Control and Prevention		South Korea	2020-05-08			2020-05-01	SAMN14734235	SRS6577260	SRP259402		Homo sapiens; patient	Human	Human	Escherichia coli	PRJNA628558	174041
ESC_RA4043AA	ECO20181364	ST137414				2018	Korea Centers for Disease Control and Prevention		South Korea	2020-05-08			2020-05-01	SAMN14734233	SRS6577259	SRP259402		Homo sapiens; patient	Human	Human	Escherichia coli	PRJNA628558	174043
ESC_RA4136AA	ECO20121544	ST137275				2012	Korea Centers for Disease Control and Prevention		South Korea	2020-05-08			2020-05-01	SAMN14734088	SRS6577165	SRP259402		Homo sapiens; patient	Human	Human	Escherichia coli	PRJNA628558	174136
ESC_RA4177AA	ECO20181747	ST137314				2018	Korea Centers for Disease Control and Prevention		South Korea	2020-05-08			2020-05-01	SAMN14734255	SRS6577124	SRP259402		Homo sapiens; patient	Human	Human	Escherichia coli	PRJNA628558	174177
ESC_RA4178AA	ECO20181484	ST137311				2018	Korea Centers for Disease Control and Prevention		South Korea	2020-05-08			2020-05-01	SAMN14734254	SRS6577123	SRP259402		Homo sapiens; patient	Human	Human	Escherichia coli	PRJNA628558	174178
ESC_UA6562AA	ADD183	ST162048	Sinaloa	Navolato		2013	Universidad Autonoma de Sinaloa		Mexico	2021-03-23	24.72489	-107.62072	2021-03-20	SAMN18352999	SRS8517857	SRP311424		Water (agricultural drainage ditch)	Environment	Water/River	Escherichia coli	PRJNA715781	206562
ESC_VA2425AA	504208	ST164809					University of Maryland, School of Medicine	Asia	India	2021-05-01	20.59	78.96	2021-04-01	SAMN14127506	SRS6296705	SRP252199		Homo sapiens; stool	Human	Human	Escherichia coli	PRJNA607273	212425
ESC_WA3354AA	751292	ST175243			5	2019	Public Health England	Europe	United Kingdom	2021-08-10			2021-08-08	SAMN20606624	SRS9700920	SRP071789	Escherichia	Homo sapiens; human	Human	Human	Escherichia coli	PRJNA315192	223354
ESC_WA8353AA	506412	ST178638			3	2018	Public Health England	Europe	United Kingdom	2021-10-01			2021-08-11	SAMN20700386	SRS9742642	SRP071789	Escherichia	Homo sapiens; human	Human	Human	Escherichia coli	PRJNA315192	228353
ESC_WA8372AA	506411	ST178451			3	2018	Public Health England	Europe	United Kingdom	2021-10-01			2021-08-11	SAMN20700387	SRS9742615	SRP071789	Escherichia	Homo sapiens; human	Human	Human	Escherichia coli	PRJNA315192	228372
ESC_XA2542AA	E19059	ST181054	Guangdong			2019	Shenzhen Centre for Disease Control and Prevention, Shenzhen, China		China	2021-11-01			2021-10-01	SAMN19789601	SRS9242914	SRP324758		Homo sapiens; stool	Human	Human	Escherichia coli	PRJNA739477	232542
ESC_XA2545AA	E19033	ST181043	Guangdong			2019	Shenzhen Centre for Disease Control and Prevention, Shenzhen, China		China	2021-11-01			2021-10-01	SAMN19789598	SRS9242911	SRP324758		Homo sapiens; stool	Human	Human	Escherichia coli	PRJNA739477	232545
ESC_XA2558AA	E18103	ST181070	Guangdong			2018	Shenzhen Centre for Disease Control and Prevention, Shenzhen, China		China	2021-11-01			2021-10-01	SAMN19789587	SRS9242898	SRP324758		Homo sapiens; stool	Human	Human	Escherichia coli	PRJNA739477	232558
ESC_XA2562AA	E18090	ST181055	Guangdong			2018	Shenzhen Centre for Disease Control and Prevention, Shenzhen, China		China	2021-11-01			2021-10-01	SAMN19789583	SRS9242894	SRP324758		Homo sapiens; stool	Human	Human	Escherichia coli	PRJNA739477	232562
